# Supplementary material
Source: publisher site journal article supplement (https://www.spandidos-publications.com/3329/downloadSupplementary)
Supplement: Supplementary file 1 [file downloadSupplementary]

## Sheet: Target genes for KEGG analyses 
Table SI. Target genes for KEGG analyses of miRNAs.
Term	database	Id	Sample number	Background number	P-Value	Corrected P-Value	GeneIDs	Genes	miRNA
Wnt signaling pathway	KEGG PATHWAY	hsa04310	11	143	7.8292e-06	0.000261285	6885;56998;89780;5599;387;1452;5602;8323;8607;6934;8313	MAP3K7;CTNNBIP1;WNT3A;MAPK8;RHOA;CSNK1A1;MAPK10;FZD6;RUVBL1;TCF7L2;AXIN2	hsa-miR-103a-3p;hsa-miR-671-5p;hsa-miR-103a-3p;hsa-miR-374b-3p;hsa-miR-128-1-5p;hsa-miR-505-3p;hsa-miR-221-3p;hsa-miR-103a-3p;hsa-miR-25-5p;hsa-miR-505-3p;hsa-miR-103a-3p
MicroRNAs in cancer	KEGG PATHWAY	hsa05206	19	299	7.46293e-08	1.65677e-05	993;131405;6624;9493;1021;89780;7422;1545;3678;10018;4194;3065;54541;4193;8626;3845;6659;387;23405	CDC25A;TRIM71;FSCN1;KIF23;CDK6;WNT3A;VEGFA;CYP1B1;ITGA5;BCL2L11;MDM4;HDAC1;DDIT4;MDM2;TP63;KRAS;SOX4;RHOA;DICER1	hsa-miR-103a-3p;hsa-miR-4485-3p;hsa-miR-25-5p;hsa-miR-103a-3p;hsa-miR-103a-3p;hsa-miR-103a-3p;hsa-miR-374b-3p;hsa-miR-221-3p;hsa-miR-222-5p;hsa-miR-221-3p,hsa-miR-339-5p;hsa-miR-25-5p;hsa-miR-671-5p;hsa-miR-221-3p,hsa-miR-222-5p;hsa-miR-221-3p;hsa-miR-25-5p;hsa-miR-671-5p;hsa-miR-185-3p;hsa-miR-128-1-5p;hsa-miR-103a-3p
Endocytosis	KEGG PATHWAY	hsa04144	17	260	2.47286e-07	2.1223e-05	830;57154;3815;27183;3799;3106;89853;55048;11021;2348;10890;4193;382;9230;3798;387;23396	CAPZA2;SMURF1;KIT;VPS4A;KIF5B;HLA-B;MVB12B;VPS37C;RAB35;FOLR1;RAB10;MDM2;ARF6;RAB11B;KIF5A;RHOA;PIP5K1C	hsa-miR-103a-3p,hsa-miR-374b-3p;hsa-miR-25-5p;hsa-miR-4485-3p;hsa-miR-103a-3p;hsa-miR-1296-5p;hsa-miR-222-5p;hsa-miR-25-5p;hsa-miR-185-3p;hsa-miR-4485-3p;hsa-miR-185-3p;hsa-miR-103a-3p;hsa-miR-221-3p;hsa-miR-103a-3p;hsa-miR-25-5p;hsa-miR-103a-3p;hsa-miR-128-1-5p;hsa-miR-25-5p
Pathways in cancer	KEGG PATHWAY	hsa05200	21	397	2.86798e-07	2.1223e-05	1021;89780;8030;3815;7422;3673;2247;5599;8313;4193;7170;3065;5602;3845;862;8323;64399;2353;6934;387;5295	CDK6;WNT3A;CCDC6;KIT;VEGFA;ITGA2;FGF2;MAPK8;AXIN2;MDM2;TPM3;HDAC1;MAPK10;KRAS;RUNX1T1;FZD6;HHIP;FOS;TCF7L2;RHOA;PIK3R1	hsa-miR-103a-3p;hsa-miR-103a-3p;hsa-miR-671-5p;hsa-miR-4485-3p;hsa-miR-374b-3p;hsa-miR-103a-3p;hsa-miR-103a-3p,hsa-miR-222-5p;hsa-miR-374b-3p;hsa-miR-103a-3p;hsa-miR-221-3p;hsa-miR-25-5p;hsa-miR-671-5p;hsa-miR-221-3p;hsa-miR-671-5p;hsa-miR-103a-3p;hsa-miR-103a-3p;hsa-miR-181a-3p;hsa-miR-221-3p;hsa-miR-505-3p;hsa-miR-128-1-5p;hsa-miR-103a-3p,hsa-miR-221-3p
Hippo signaling pathway	KEGG PATHWAY	hsa04390	13	154	4.47018e-07	2.48095e-05	7533;7534;6934;5515;89780;4771;3398;8323;4092;27113;60485;154796;8313	YWHAH;YWHAZ;TCF7L2;PPP2CA;WNT3A;NF2;ID2;FZD6;SMAD7;BBC3;SAV1;AMOT;AXIN2	hsa-miR-103a-3p;hsa-miR-671-5p;hsa-miR-505-3p;hsa-miR-185-3p;hsa-miR-103a-3p;hsa-miR-25-5p;hsa-miR-222-5p;hsa-miR-103a-3p;hsa-miR-374b-3p;hsa-miR-221-3p;hsa-miR-103a-3p;hsa-miR-103a-3p;hsa-miR-103a-3p
Cell cycle	KEGG PATHWAY	hsa04110	10	124	1.37642e-05	0.000339516	4176;993;4998;1111;1021;7534;4193;7533;3065;8243	MCM7;CDC25A;ORC1;CHEK1;CDK6;YWHAZ;MDM2;YWHAH;HDAC1;SMC1A	hsa-miR-103a-3p;hsa-miR-103a-3p;hsa-miR-339-5p;hsa-miR-505-3p;hsa-miR-103a-3p;hsa-miR-671-5p;hsa-miR-221-3p;hsa-miR-103a-3p;hsa-miR-671-5p;hsa-miR-339-5p
Apoptosis	KEGG PATHWAY	hsa04210	8	140	0.000883977	0.00560694	5295;5599;10018;4217;27113;5602;3845;2353	PIK3R1;MAPK8;BCL2L11;MAP3K5;BBC3;MAPK10;KRAS;FOS	hsa-miR-103a-3p,hsa-miR-221-3p;hsa-miR-374b-3p;hsa-miR-221-3p,hsa-miR-339-5p;hsa-miR-181a-3p;hsa-miR-221-3p;hsa-miR-221-3p;hsa-miR-671-5p;hsa-miR-221-3p
Colorectal cancer	KEGG PATHWAY	hsa05210	8	62	4.3767e-06	0.000194326	5295;5599;8313;5602;3845;2353;6934;387	PIK3R1;MAPK8;AXIN2;MAPK10;KRAS;FOS;TCF7L2;RHOA	hsa-miR-103a-3p,hsa-miR-221-3p;hsa-miR-374b-3p;hsa-miR-103a-3p;hsa-miR-221-3p;hsa-miR-671-5p;hsa-miR-221-3p;hsa-miR-505-3p;hsa-miR-128-1-5p
Epstein-Barr virus infection	KEGG PATHWAY	hsa05169	13	204	8.23872e-06	0.000261285	7533;9612;953;6885;23118;7534;5295;5599;9519;3065;5602;4193;3106	YWHAH;NCOR2;ENTPD1;MAP3K7;TAB2;YWHAZ;PIK3R1;MAPK8;TBPL1;HDAC1;MAPK10;MDM2;HLA-B	hsa-miR-103a-3p;hsa-miR-2277-5p,hsa-miR-25-5p;hsa-miR-103a-3p;hsa-miR-103a-3p;hsa-miR-222-5p;hsa-miR-671-5p;hsa-miR-103a-3p,hsa-miR-221-3p;hsa-miR-374b-3p;hsa-miR-103a-3p;hsa-miR-671-5p;hsa-miR-221-3p;hsa-miR-221-3p;hsa-miR-222-5p
Axon guidance	KEGG PATHWAY	hsa04360	7	176	0.0118604	0.0365697	5295;6405;3845;9723;8440;387;57556	PIK3R1;SEMA3F;KRAS;SEMA3E;NCK2;RHOA;SEMA6A	hsa-miR-103a-3p,hsa-miR-221-3p;hsa-miR-185-3p;hsa-miR-671-5p;hsa-miR-222-5p;hsa-miR-505-3p;hsa-miR-128-1-5p;hsa-miR-103a-3p
Prolactin signaling pathway	KEGG PATHWAY	hsa04917	8	72	1.19606e-05	0.000331907	5295;5599;5602;3845;9655;2353;9021;1586	PIK3R1;MAPK8;MAPK10;KRAS;SOCS5;FOS;SOCS3;CYP17A1	hsa-miR-103a-3p,hsa-miR-221-3p;hsa-miR-374b-3p;hsa-miR-221-3p;hsa-miR-671-5p;hsa-miR-374b-3p;hsa-miR-221-3p;hsa-miR-221-3p;hsa-miR-25-5p
Dopaminergic synapse	KEGG PATHWAY	hsa04728	10	130	2.0168e-05	0.000437089	2353;5527;775;774;5515;5599;5602;3799;3798;50632	FOS;PPP2R5C;CACNA1C;CACNA1B;PPP2CA;MAPK8;MAPK10;KIF5B;KIF5A;CALY	hsa-miR-221-3p;hsa-miR-103a-3p;hsa-miR-185-3p;hsa-miR-25-5p;hsa-miR-185-3p;hsa-miR-374b-3p;hsa-miR-221-3p;hsa-miR-1296-5p;hsa-miR-103a-3p;hsa-miR-25-5p
HTLV-I infection	KEGG PATHWAY	hsa05166	14	259	2.16576e-05	0.000437089	821;1111;89780;2005;9519;64784;5295;3106;83660;5599;3845;8323;2353;10714	CANX;CHEK1;WNT3A;ELK4;TBPL1;CRTC3;PIK3R1;HLA-B;TLN2;MAPK8;KRAS;FZD6;FOS;POLD3	hsa-miR-505-3p;hsa-miR-505-3p;hsa-miR-103a-3p;hsa-miR-103a-3p;hsa-miR-103a-3p;hsa-miR-671-5p;hsa-miR-103a-3p,hsa-miR-221-3p;hsa-miR-222-5p;hsa-miR-25-5p;hsa-miR-374b-3p;hsa-miR-671-5p;hsa-miR-103a-3p;hsa-miR-221-3p;hsa-miR-103a-3p
FoxO signaling pathway	KEGG PATHWAY	hsa04068	10	134	2.57333e-05	0.000476066	10018;5599;5295;5565;5602;3845;4193;6648;604;114907	BCL2L11;MAPK8;PIK3R1;PRKAB2;MAPK10;KRAS;MDM2;SOD2;BCL6;FBXO32	hsa-miR-221-3p,hsa-miR-339-5p;hsa-miR-374b-3p;hsa-miR-103a-3p,hsa-miR-221-3p;hsa-miR-103a-3p;hsa-miR-221-3p;hsa-miR-671-5p;hsa-miR-221-3p;hsa-miR-339-5p;hsa-miR-339-5p;hsa-miR-4485-3p
Ubiquitin mediated proteolysis	KEGG PATHWAY	hsa04120	10	137	3.07268e-05	0.000491196	55585;57154;10055;54926;9886;55294;4193;8451;9021;3093	UBE2Q1;SMURF1;SAE1;UBE2R2;RHOBTB1;FBXW7;MDM2;CUL4A;SOCS3;UBE2K	hsa-miR-103a-3p;hsa-miR-25-5p;hsa-miR-181a-3p;hsa-miR-103a-3p;hsa-miR-181a-3p;hsa-miR-103a-3p;hsa-miR-221-3p;hsa-miR-103a-3p;hsa-miR-221-3p;hsa-miR-4485-3p
PI3K-Akt signaling pathway	KEGG PATHWAY	hsa04151	16	342	3.09763e-05	0.000491196	7533;7422;5527;1021;7534;3815;5515;3673;3678;2247;10018;9180;54541;4193;3845;5295	YWHAH;VEGFA;PPP2R5C;CDK6;YWHAZ;KIT;PPP2CA;ITGA2;ITGA5;FGF2;BCL2L11;OSMR;DDIT4;MDM2;KRAS;PIK3R1	hsa-miR-103a-3p;hsa-miR-374b-3p;hsa-miR-103a-3p;hsa-miR-103a-3p;hsa-miR-671-5p;hsa-miR-4485-3p;hsa-miR-185-3p;hsa-miR-103a-3p;hsa-miR-222-5p;hsa-miR-103a-3p,hsa-miR-222-5p;hsa-miR-221-3p,hsa-miR-339-5p;hsa-miR-25-5p;hsa-miR-221-3p,hsa-miR-222-5p;hsa-miR-221-3p;hsa-miR-671-5p;hsa-miR-103a-3p,hsa-miR-221-3p
TNF signaling pathway	KEGG PATHWAY	hsa04668	9	110	3.32376e-05	0.000491916	6885;23118;5295;5599;1051;4217;5602;2353;9021	MAP3K7;TAB2;PIK3R1;MAPK8;CEBPB;MAP3K5;MAPK10;FOS;SOCS3	hsa-miR-103a-3p;hsa-miR-222-5p;hsa-miR-103a-3p,hsa-miR-221-3p;hsa-miR-374b-3p;hsa-miR-2277-5p;hsa-miR-181a-3p;hsa-miR-221-3p;hsa-miR-221-3p;hsa-miR-221-3p
mRNA surveillance pathway	KEGG PATHWAY	hsa03015	8	92	6.08492e-05	0.000844282	11052;7919;5527;5515;29101;23283;22985;8731	CPSF6;DDX39B;PPP2R5C;PPP2CA;SSU72;CSTF2T;ACIN1;RNMT	hsa-miR-374b-3p;hsa-miR-671-5p;hsa-miR-103a-3p;hsa-miR-185-3p;hsa-miR-103a-3p;hsa-miR-221-3p;hsa-miR-128-1-5p;hsa-miR-103a-3p
Sphingolipid signaling pathway	KEGG PATHWAY	hsa04071	9	121	6.64963e-05	0.000868363	5527;5515;5295;5599;4217;5602;3845;387;10715	PPP2R5C;PPP2CA;PIK3R1;MAPK8;MAP3K5;MAPK10;KRAS;RHOA;CERS1	hsa-miR-103a-3p;hsa-miR-185-3p;hsa-miR-103a-3p,hsa-miR-221-3p;hsa-miR-374b-3p;hsa-miR-181a-3p;hsa-miR-221-3p;hsa-miR-671-5p;hsa-miR-128-1-5p;hsa-miR-2277-5p
mTOR signaling pathway	KEGG PATHWAY	hsa04150	10	154	7.75981e-05	0.000957043	3845;96459;89780;51719;5295;54541;8323;525;387;6249	KRAS;FNIP1;WNT3A;CAB39;PIK3R1;DDIT4;FZD6;ATP6V1B1;RHOA;CLIP1	hsa-miR-671-5p;hsa-miR-25-5p;hsa-miR-103a-3p;hsa-miR-103a-3p;hsa-miR-103a-3p,hsa-miR-221-3p;hsa-miR-221-3p,hsa-miR-222-5p;hsa-miR-103a-3p;hsa-miR-2277-5p;hsa-miR-128-1-5p;hsa-miR-103a-3p,hsa-miR-4485-3p
Type II diabetes mellitus	KEGG PATHWAY	hsa04930	6	48	8.2618e-05	0.000965326	775;774;5295;5599;5602;9021	CACNA1C;CACNA1B;PIK3R1;MAPK8;MAPK10;SOCS3	hsa-miR-185-3p;hsa-miR-25-5p;hsa-miR-103a-3p,hsa-miR-221-3p;hsa-miR-374b-3p;hsa-miR-221-3p;hsa-miR-221-3p
Adherens junction	KEGG PATHWAY	hsa04520	7	74	0.00010778	0.00118304	7082;6885;10163;6934;5792;5795;387	TJP1;MAP3K7;WASF2;TCF7L2;PTPRF;PTPRJ;RHOA	hsa-miR-103a-3p;hsa-miR-103a-3p;hsa-miR-2277-5p;hsa-miR-505-3p;hsa-miR-25-5p;hsa-miR-181a-3p;hsa-miR-128-1-5p
Choline metabolism in cancer	KEGG PATHWAY	hsa05231	8	101	0.00011191	0.00118304	10163;5295;5599;56261;5602;3845;2353;23396	WASF2;PIK3R1;MAPK8;GPCPD1;MAPK10;KRAS;FOS;PIP5K1C	hsa-miR-2277-5p;hsa-miR-103a-3p,hsa-miR-221-3p;hsa-miR-374b-3p;hsa-miR-103a-3p;hsa-miR-221-3p;hsa-miR-671-5p;hsa-miR-221-3p;hsa-miR-25-5p
Viral carcinogenesis	KEGG PATHWAY	hsa05203	11	205	0.00017211	0.00172981	7533;1021;1111;7534;5295;9519;3065;3845;4193;3106;387	YWHAH;CDK6;CHEK1;YWHAZ;PIK3R1;TBPL1;HDAC1;KRAS;MDM2;HLA-B;RHOA	hsa-miR-103a-3p;hsa-miR-103a-3p;hsa-miR-505-3p;hsa-miR-671-5p;hsa-miR-103a-3p,hsa-miR-221-3p;hsa-miR-103a-3p;hsa-miR-671-5p;hsa-miR-671-5p;hsa-miR-221-3p;hsa-miR-222-5p;hsa-miR-128-1-5p
Insulin signaling pathway	KEGG PATHWAY	hsa04910	9	139	0.000179215	0.00172981	5261;5255;5295;5599;5565;5602;3845;5792;9021	PHKG2;PHKA1;PIK3R1;MAPK8;PRKAB2;MAPK10;KRAS;PTPRF;SOCS3	hsa-miR-4485-3p;hsa-miR-103a-3p;hsa-miR-103a-3p,hsa-miR-221-3p;hsa-miR-374b-3p;hsa-miR-103a-3p;hsa-miR-221-3p;hsa-miR-671-5p;hsa-miR-25-5p;hsa-miR-221-3p
Signaling pathways regulating pluripotency of stem cells	KEGG PATHWAY	hsa04550	9	142	0.000208332	0.00192707	9314;5295;89780;2247;3398;93;3845;8323;8313	KLF4;PIK3R1;WNT3A;FGF2;ID2;ACVR2B;KRAS;FZD6;AXIN2	hsa-miR-103a-3p;hsa-miR-103a-3p,hsa-miR-221-3p;hsa-miR-103a-3p;hsa-miR-103a-3p,hsa-miR-222-5p;hsa-miR-222-5p;hsa-miR-103a-3p,hsa-miR-221-3p;hsa-miR-671-5p;hsa-miR-103a-3p;hsa-miR-103a-3p
Salmonella infection	KEGG PATHWAY	hsa05132	7	86	0.000256001	0.00220826	7082;2353;10163;5599;5602;64837;4628	TJP1;FOS;WASF2;MAPK8;MAPK10;KLC2;MYH10	hsa-miR-103a-3p;hsa-miR-221-3p;hsa-miR-2277-5p;hsa-miR-374b-3p;hsa-miR-221-3p;hsa-miR-4485-3p;hsa-miR-505-3p
Transcriptional misregulation in cancer	KEGG PATHWAY	hsa05202	10	180	0.000258625	0.00220826	604;4193;2005;4221;904;1051;3065;4299;862;3398	BCL6;MDM2;ELK4;MEN1;CCNT1;CEBPB;HDAC1;AFF1;RUNX1T1;ID2	hsa-miR-339-5p;hsa-miR-221-3p;hsa-miR-103a-3p;hsa-miR-25-5p;hsa-miR-103a-3p;hsa-miR-2277-5p;hsa-miR-671-5p;hsa-miR-25-5p;hsa-miR-103a-3p;hsa-miR-222-5p
MAPK signaling pathway	KEGG PATHWAY	hsa04010	12	255	0.000281508	0.00231462	6885;775;774;2005;2247;5599;4217;5602;3845;57551;2353;23118	MAP3K7;CACNA1C;CACNA1B;ELK4;FGF2;MAPK8;MAP3K5;MAPK10;KRAS;TAOK1;FOS;TAB2	hsa-miR-103a-3p;hsa-miR-185-3p;hsa-miR-25-5p;hsa-miR-103a-3p;hsa-miR-103a-3p,hsa-miR-222-5p;hsa-miR-374b-3p;hsa-miR-181a-3p;hsa-miR-221-3p;hsa-miR-671-5p;hsa-miR-374b-3p;hsa-miR-221-3p;hsa-miR-222-5p
Non-alcoholic fatty liver disease (NAFLD)	KEGG PATHWAY	hsa04932	9	151	0.0003202	0.00253873	1340;10018;5599;5295;4217;5565;4712;5602;9021	COX6B1;BCL2L11;MAPK8;PIK3R1;MAP3K5;PRKAB2;NDUFB6;MAPK10;SOCS3	hsa-miR-374b-3p;hsa-miR-221-3p,hsa-miR-339-5p;hsa-miR-374b-3p;hsa-miR-103a-3p,hsa-miR-221-3p;hsa-miR-181a-3p;hsa-miR-103a-3p;hsa-miR-222-5p;hsa-miR-221-3p;hsa-miR-221-3p
TGF-beta signaling pathway	KEGG PATHWAY	hsa04350	6	84	0.00133052	0.00738441	57154;5515;3398;93;4092;387	SMURF1;PPP2CA;ID2;ACVR2B;SMAD7;RHOA	hsa-miR-25-5p;hsa-miR-185-3p;hsa-miR-222-5p;hsa-miR-103a-3p,hsa-miR-221-3p;hsa-miR-374b-3p;hsa-miR-128-1-5p
Pancreatic cancer	KEGG PATHWAY	hsa05212	6	66	0.000408306	0.0030269	1021;5295;5599;5602;3845;7422	CDK6;PIK3R1;MAPK8;MAPK10;KRAS;VEGFA	hsa-miR-103a-3p;hsa-miR-103a-3p,hsa-miR-221-3p;hsa-miR-374b-3p;hsa-miR-221-3p;hsa-miR-671-5p;hsa-miR-374b-3p
Ras signaling pathway	KEGG PATHWAY	hsa04014	11	228	0.00040904	0.0030269	27;3815;2247;5599;5295;5602;3845;7422;382;8315;387	ABL2;KIT;FGF2;MAPK8;PIK3R1;MAPK10;KRAS;VEGFA;ARF6;BRAP;RHOA	hsa-miR-103a-3p;hsa-miR-4485-3p;hsa-miR-103a-3p,hsa-miR-222-5p;hsa-miR-374b-3p;hsa-miR-103a-3p,hsa-miR-221-3p;hsa-miR-221-3p;hsa-miR-671-5p;hsa-miR-374b-3p;hsa-miR-103a-3p;hsa-miR-1296-5p;hsa-miR-128-1-5p
AMPK signaling pathway	KEGG PATHWAY	hsa04152	8	125	0.000437197	0.00313089	5527;5515;51719;5295;5565;10890;9230;6885	PPP2R5C;PPP2CA;CAB39;PIK3R1;PRKAB2;RAB10;RAB11B;MAP3K7	hsa-miR-103a-3p;hsa-miR-185-3p;hsa-miR-103a-3p;hsa-miR-103a-3p,hsa-miR-221-3p;hsa-miR-103a-3p;hsa-miR-103a-3p;hsa-miR-25-5p;hsa-miR-103a-3p
Endocrine resistance	KEGG PATHWAY	hsa01522	7	97	0.000506362	0.00351289	5295;5599;5602;3845;4193;5469;2353	PIK3R1;MAPK8;MAPK10;KRAS;MDM2;MED1;FOS	hsa-miR-103a-3p,hsa-miR-221-3p;hsa-miR-374b-3p;hsa-miR-221-3p;hsa-miR-671-5p;hsa-miR-221-3p;hsa-miR-4485-3p;hsa-miR-221-3p
Progesterone-mediated oocyte maturation	KEGG PATHWAY	hsa04914	7	98	0.000536385	0.00360841	993;132864;5295;22849;5599;5602;3845	CDC25A;CPEB2;PIK3R1;CPEB3;MAPK8;MAPK10;KRAS	hsa-miR-103a-3p;hsa-miR-374b-3p;hsa-miR-103a-3p,hsa-miR-221-3p;hsa-miR-103a-3p;hsa-miR-374b-3p;hsa-miR-221-3p;hsa-miR-671-5p
Proteoglycans in cancer	KEGG PATHWAY	hsa05205	10	205	0.000682626	0.00445714	3673;7422;89780;3678;2247;5295;3845;4193;8323;387	ITGA2;VEGFA;WNT3A;ITGA5;FGF2;PIK3R1;KRAS;MDM2;FZD6;RHOA	hsa-miR-103a-3p;hsa-miR-374b-3p;hsa-miR-103a-3p;hsa-miR-222-5p;hsa-miR-103a-3p,hsa-miR-222-5p;hsa-miR-103a-3p,hsa-miR-221-3p;hsa-miR-671-5p;hsa-miR-221-3p;hsa-miR-103a-3p;hsa-miR-128-1-5p
Thyroid cancer	KEGG PATHWAY	hsa05216	4	29	0.000945634	0.00581747	7170;6934;3845;8030	TPM3;TCF7L2;KRAS;CCDC6	hsa-miR-25-5p;hsa-miR-505-3p;hsa-miR-671-5p;hsa-miR-671-5p
Insulin resistance	KEGG PATHWAY	hsa04931	7	109	0.000969579	0.00581747	8473;5295;5599;5565;5602;5792;9021	OGT;PIK3R1;MAPK8;PRKAB2;MAPK10;PTPRF;SOCS3	hsa-miR-103a-3p;hsa-miR-103a-3p,hsa-miR-221-3p;hsa-miR-374b-3p;hsa-miR-103a-3p;hsa-miR-221-3p;hsa-miR-25-5p;hsa-miR-221-3p
Basal cell carcinoma	KEGG PATHWAY	hsa05217	5	55	0.00124246	0.0072586	8323;6934;64399;8313;89780	FZD6;TCF7L2;HHIP;AXIN2;WNT3A	hsa-miR-103a-3p;hsa-miR-505-3p;hsa-miR-181a-3p;hsa-miR-103a-3p;hsa-miR-103a-3p
Herpes simplex infection	KEGG PATHWAY	hsa05168	9	186	0.00131748	0.00738441	6885;23118;5599;54926;9519;5602;3106;2353;9021	MAP3K7;TAB2;MAPK8;UBE2R2;TBPL1;MAPK10;HLA-B;FOS;SOCS3	hsa-miR-103a-3p;hsa-miR-222-5p;hsa-miR-374b-3p;hsa-miR-103a-3p;hsa-miR-103a-3p;hsa-miR-221-3p;hsa-miR-222-5p;hsa-miR-221-3p;hsa-miR-221-3p
Acute myeloid leukemia	KEGG PATHWAY	hsa05221	5	57	0.00144041	0.0077351	3815;6934;5295;3845;862	KIT;TCF7L2;PIK3R1;KRAS;RUNX1T1	hsa-miR-4485-3p;hsa-miR-505-3p;hsa-miR-103a-3p,hsa-miR-221-3p;hsa-miR-671-5p;hsa-miR-103a-3p
Apoptosis - multiple species	KEGG PATHWAY	hsa04215	4	33	0.0014634	0.0077351	27113;5602;5599;10018	BBC3;MAPK10;MAPK8;BCL2L11	hsa-miR-221-3p;hsa-miR-221-3p;hsa-miR-374b-3p;hsa-miR-221-3p,hsa-miR-339-5p
Neurotrophin signaling pathway	KEGG PATHWAY	hsa04722	7	120	0.00164001	0.00839615	5295;5599;4217;5602;3845;11108;387	PIK3R1;MAPK8;MAP3K5;MAPK10;KRAS;PRDM4;RHOA	hsa-miR-103a-3p,hsa-miR-221-3p;hsa-miR-374b-3p;hsa-miR-181a-3p;hsa-miR-221-3p;hsa-miR-671-5p;hsa-miR-374b-3p;hsa-miR-128-1-5p
ErbB signaling pathway	KEGG PATHWAY	hsa04012	6	88	0.0016641	0.00839615	27;5295;5599;5602;3845;8440	ABL2;PIK3R1;MAPK8;MAPK10;KRAS;NCK2	hsa-miR-103a-3p;hsa-miR-103a-3p,hsa-miR-221-3p;hsa-miR-374b-3p;hsa-miR-221-3p;hsa-miR-671-5p;hsa-miR-505-3p
Oocyte meiosis	KEGG PATHWAY	hsa04114	7	123	0.00187402	0.00924515	7533;5527;7534;5515;132864;22849;8243	YWHAH;PPP2R5C;YWHAZ;PPP2CA;CPEB2;CPEB3;SMC1A	hsa-miR-103a-3p;hsa-miR-103a-3p;hsa-miR-671-5p;hsa-miR-185-3p;hsa-miR-374b-3p;hsa-miR-103a-3p;hsa-miR-339-5p
cAMP signaling pathway	KEGG PATHWAY	hsa04024	9	199	0.00204947	0.00989093	5144;775;5348;5295;5599;64399;5602;2353;387	PDE4D;CACNA1C;FXYD1;PIK3R1;MAPK8;HHIP;MAPK10;FOS;RHOA	hsa-miR-103a-3p;hsa-miR-185-3p;hsa-miR-25-5p;hsa-miR-103a-3p,hsa-miR-221-3p;hsa-miR-374b-3p;hsa-miR-181a-3p;hsa-miR-221-3p;hsa-miR-221-3p;hsa-miR-128-1-5p
Longevity regulating pathway - multiple species	KEGG PATHWAY	hsa04213	5	64	0.00231833	0.0107778	6648;5565;3065;5295;3845	SOD2;PRKAB2;HDAC1;PIK3R1;KRAS	hsa-miR-339-5p;hsa-miR-103a-3p;hsa-miR-671-5p;hsa-miR-103a-3p,hsa-miR-221-3p;hsa-miR-671-5p
Focal adhesion	KEGG PATHWAY	hsa04510	9	203	0.00233035	0.0107778	3673;3678;5295;5599;83660;5602;7422;387;23396	ITGA2;ITGA5;PIK3R1;MAPK8;TLN2;MAPK10;VEGFA;RHOA;PIP5K1C	hsa-miR-103a-3p;hsa-miR-222-5p;hsa-miR-103a-3p,hsa-miR-221-3p;hsa-miR-374b-3p;hsa-miR-25-5p;hsa-miR-221-3p;hsa-miR-374b-3p;hsa-miR-128-1-5p;hsa-miR-25-5p
Osteoclast differentiation	KEGG PATHWAY	hsa04380	7	132	0.00273359	0.0123848	6885;23118;5295;5599;5602;2353;9021	MAP3K7;TAB2;PIK3R1;MAPK8;MAPK10;FOS;SOCS3	hsa-miR-103a-3p;hsa-miR-222-5p;hsa-miR-103a-3p,hsa-miR-221-3p;hsa-miR-374b-3p;hsa-miR-221-3p;hsa-miR-221-3p;hsa-miR-221-3p
Epithelial cell signaling in Helicobacter pylori infection	KEGG PATHWAY	hsa05120	5	68	0.00296687	0.0131729	58494;525;5602;5599;7082	JAM2;ATP6V1B1;MAPK10;MAPK8;TJP1	hsa-miR-25-5p;hsa-miR-2277-5p;hsa-miR-221-3p;hsa-miR-374b-3p;hsa-miR-103a-3p
p53 signaling pathway	KEGG PATHWAY	hsa04115	5	69	0.00314755	0.0137011	4194;27113;1111;1021;4193	MDM4;BBC3;CHEK1;CDK6;MDM2	hsa-miR-25-5p;hsa-miR-221-3p;hsa-miR-505-3p;hsa-miR-103a-3p;hsa-miR-221-3p
Regulation of actin cytoskeleton	KEGG PATHWAY	hsa04810	9	215	0.00336022	0.0143456	10163;3673;3678;2247;5295;4628;3845;387;23396	WASF2;ITGA2;ITGA5;FGF2;PIK3R1;MYH10;KRAS;RHOA;PIP5K1C	hsa-miR-2277-5p;hsa-miR-103a-3p;hsa-miR-222-5p;hsa-miR-103a-3p,hsa-miR-222-5p;hsa-miR-103a-3p,hsa-miR-221-3p;hsa-miR-505-3p;hsa-miR-671-5p;hsa-miR-128-1-5p;hsa-miR-25-5p
Influenza A	KEGG PATHWAY	hsa05164	8	176	0.00346734	0.0144875	3836;5295;5599;11100;5602;5045;7919;9021	KPNA1;PIK3R1;MAPK8;HNRNPUL1;MAPK10;FURIN;DDX39B;SOCS3	hsa-miR-103a-3p;hsa-miR-103a-3p,hsa-miR-221-3p;hsa-miR-374b-3p;hsa-miR-671-5p;hsa-miR-221-3p;hsa-miR-103a-3p;hsa-miR-671-5p;hsa-miR-221-3p
Melanoma	KEGG PATHWAY	hsa05218	5	71	0.00353249	0.0144875	5295;3845;2247;1021;4193	PIK3R1;KRAS;FGF2;CDK6;MDM2	hsa-miR-103a-3p,hsa-miR-221-3p;hsa-miR-671-5p;hsa-miR-103a-3p,hsa-miR-222-5p;hsa-miR-103a-3p;hsa-miR-221-3p
Tight junction	KEGG PATHWAY	hsa04530	7	139	0.00358925	0.0144875	58494;7082;5515;3845;55870;387;4628	JAM2;TJP1;PPP2CA;KRAS;ASH1L;RHOA;MYH10	hsa-miR-25-5p;hsa-miR-103a-3p;hsa-miR-185-3p;hsa-miR-671-5p;hsa-miR-103a-3p,hsa-miR-374b-3p;hsa-miR-128-1-5p;hsa-miR-505-3p
T cell receptor signaling pathway	KEGG PATHWAY	hsa04660	6	105	0.00383097	0.015187	6885;5295;3845;8440;2353;387	MAP3K7;PIK3R1;KRAS;NCK2;FOS;RHOA	hsa-miR-103a-3p;hsa-miR-103a-3p,hsa-miR-221-3p;hsa-miR-671-5p;hsa-miR-505-3p;hsa-miR-221-3p;hsa-miR-128-1-5p
Chronic myeloid leukemia	KEGG PATHWAY	hsa05220	5	73	0.0039501	0.0153226	3845;3065;5295;1021;4193	KRAS;HDAC1;PIK3R1;CDK6;MDM2	hsa-miR-671-5p;hsa-miR-671-5p;hsa-miR-103a-3p,hsa-miR-221-3p;hsa-miR-103a-3p;hsa-miR-221-3p
Toll-like receptor signaling pathway	KEGG PATHWAY	hsa04620	6	106	0.00400319	0.0153226	6885;23118;5295;5599;5602;2353	MAP3K7;TAB2;PIK3R1;MAPK8;MAPK10;FOS	hsa-miR-103a-3p;hsa-miR-222-5p;hsa-miR-103a-3p,hsa-miR-221-3p;hsa-miR-374b-3p;hsa-miR-221-3p;hsa-miR-221-3p
Phospholipase D signaling pathway	KEGG PATHWAY	hsa04072	7	144	0.00431526	0.0162371	3815;5295;3845;382;387;23396;554	KIT;PIK3R1;KRAS;ARF6;RHOA;PIP5K1C;AVPR2	hsa-miR-4485-3p;hsa-miR-103a-3p,hsa-miR-221-3p;hsa-miR-671-5p;hsa-miR-103a-3p;hsa-miR-128-1-5p;hsa-miR-25-5p;hsa-miR-25-5p
Pertussis	KEGG PATHWAY	hsa05133	5	75	0.00440186	0.0162869	2353;3678;387;5599;5602	FOS;ITGA5;RHOA;MAPK8;MAPK10	hsa-miR-221-3p;hsa-miR-222-5p;hsa-miR-128-1-5p;hsa-miR-374b-3p;hsa-miR-221-3p
Hepatitis B	KEGG PATHWAY	hsa05161	7	146	0.0046348	0.0168676	1021;7534;5295;5599;5602;3845;2353	CDK6;YWHAZ;PIK3R1;MAPK8;MAPK10;KRAS;FOS	hsa-miR-103a-3p;hsa-miR-671-5p;hsa-miR-103a-3p,hsa-miR-221-3p;hsa-miR-374b-3p;hsa-miR-221-3p;hsa-miR-671-5p;hsa-miR-221-3p
Hedgehog signaling pathway	KEGG PATHWAY	hsa04340	4	47	0.00478226	0.0171236	1452;57154;64399;1456	CSNK1A1;SMURF1;HHIP;CSNK1G3	hsa-miR-505-3p;hsa-miR-25-5p;hsa-miR-181a-3p;hsa-miR-103a-3p
EGFR tyrosine kinase inhibitor resistance	KEGG PATHWAY	hsa01521	5	81	0.00597669	0.0210607	7422;3845;2247;5295;10018	VEGFA;KRAS;FGF2;PIK3R1;BCL2L11	hsa-miR-374b-3p;hsa-miR-671-5p;hsa-miR-103a-3p,hsa-miR-222-5p;hsa-miR-103a-3p,hsa-miR-221-3p;hsa-miR-221-3p,hsa-miR-339-5p
Thyroid hormone signaling pathway	KEGG PATHWAY	hsa04919	6	118	0.00654296	0.0224417	5295;3065;3845;4193;10025;5469	PIK3R1;HDAC1;KRAS;MDM2;MED16;MED1	hsa-miR-103a-3p,hsa-miR-221-3p;hsa-miR-671-5p;hsa-miR-671-5p;hsa-miR-221-3p;hsa-miR-25-5p;hsa-miR-4485-3p
Hypertrophic cardiomyopathy (HCM)	KEGG PATHWAY	hsa05410	5	83	0.00657963	0.0224417	5565;7170;3678;775;3673	PRKAB2;TPM3;ITGA5;CACNA1C;ITGA2	hsa-miR-103a-3p;hsa-miR-25-5p;hsa-miR-222-5p;hsa-miR-185-3p;hsa-miR-103a-3p
Endometrial cancer	KEGG PATHWAY	hsa05213	4	52	0.00667185	0.0224417	6934;8313;3845;5295	TCF7L2;AXIN2;KRAS;PIK3R1	hsa-miR-505-3p;hsa-miR-103a-3p;hsa-miR-671-5p;hsa-miR-103a-3p,hsa-miR-221-3p
Dorso-ventral axis formation	KEGG PATHWAY	hsa04320	3	28	0.00805811	0.0267	132864;3845;22849	CPEB2;KRAS;CPEB3	hsa-miR-374b-3p;hsa-miR-671-5p;hsa-miR-103a-3p
Protein processing in endoplasmic reticulum	KEGG PATHWAY	hsa04141	7	166	0.00889104	0.0289546	10525;821;3301;5599;4217;5602;10970	HYOU1;CANX;DNAJA1;MAPK8;MAP3K5;MAPK10;CKAP4	hsa-miR-1296-5p;hsa-miR-505-3p;hsa-miR-103a-3p;hsa-miR-374b-3p;hsa-miR-181a-3p;hsa-miR-221-3p;hsa-miR-25-5p
NOD-like receptor signaling pathway	KEGG PATHWAY	hsa04621	4	57	0.0089994	0.0289546	5599;6885;23118;5602	MAPK8;MAP3K7;TAB2;MAPK10	hsa-miR-374b-3p;hsa-miR-103a-3p;hsa-miR-222-5p;hsa-miR-221-3p
Rap1 signaling pathway	KEGG PATHWAY	hsa04015	8	211	0.00960617	0.0304653	3815;5295;2247;83660;3845;7422;57568;387	KIT;PIK3R1;FGF2;TLN2;KRAS;VEGFA;SIPA1L2;RHOA	hsa-miR-4485-3p;hsa-miR-103a-3p,hsa-miR-221-3p;hsa-miR-103a-3p,hsa-miR-222-5p;hsa-miR-25-5p;hsa-miR-671-5p;hsa-miR-374b-3p;hsa-miR-103a-3p;hsa-miR-128-1-5p
Hepatitis C	KEGG PATHWAY	hsa05160	6	133	0.0111526	0.0348714	5515;5295;5599;5602;3845;9021	PPP2CA;PIK3R1;MAPK8;MAPK10;KRAS;SOCS3	hsa-miR-185-3p;hsa-miR-103a-3p,hsa-miR-221-3p;hsa-miR-374b-3p;hsa-miR-221-3p;hsa-miR-671-5p;hsa-miR-221-3p
Melanogenesis	KEGG PATHWAY	hsa04916	5	100	0.0135094	0.040442	8323;3815;6934;3845;89780	FZD6;KIT;TCF7L2;KRAS;WNT3A	hsa-miR-103a-3p;hsa-miR-4485-3p;hsa-miR-505-3p;hsa-miR-671-5p;hsa-miR-103a-3p
Shigellosis	KEGG PATHWAY	hsa05131	4	65	0.0137224	0.040442	3678;5602;10163;5599	ITGA5;MAPK10;WASF2;MAPK8	hsa-miR-222-5p;hsa-miR-221-3p;hsa-miR-2277-5p;hsa-miR-374b-3p
Glioma	KEGG PATHWAY	hsa05214	4	65	0.0137224	0.040442	3845;5295;1021;4193	KRAS;PIK3R1;CDK6;MDM2	hsa-miR-671-5p;hsa-miR-103a-3p,hsa-miR-221-3p;hsa-miR-103a-3p;hsa-miR-221-3p
AGE-RAGE signaling pathway in diabetic complications	KEGG PATHWAY	hsa04933	5	101	0.0140272	0.040442	7422;5599;5602;3845;5295	VEGFA;MAPK8;MAPK10;KRAS;PIK3R1	hsa-miR-374b-3p;hsa-miR-374b-3p;hsa-miR-221-3p;hsa-miR-671-5p;hsa-miR-103a-3p,hsa-miR-221-3p
Retrograde endocannabinoid signaling	KEGG PATHWAY	hsa04723	5	101	0.0140272	0.040442	2560;5599;5602;775;774	GABRB1;MAPK8;MAPK10;CACNA1C;CACNA1B	hsa-miR-103a-3p;hsa-miR-374b-3p;hsa-miR-221-3p;hsa-miR-185-3p;hsa-miR-25-5p
DNA replication	KEGG PATHWAY	hsa03030	3	36	0.0151487	0.0431154	4176;5985;10714	MCM7;RFC5;POLD3	hsa-miR-103a-3p;hsa-miR-339-5p;hsa-miR-103a-3p
Chagas disease (American trypanosomiasis)	KEGG PATHWAY	hsa05142	5	104	0.01566	0.0439331	5515;2353;5602;5599;5295	PPP2CA;FOS;MAPK10;MAPK8;PIK3R1	hsa-miR-185-3p;hsa-miR-221-3p;hsa-miR-221-3p;hsa-miR-374b-3p;hsa-miR-103a-3p,hsa-miR-221-3p
Fc epsilon RI signaling pathway	KEGG PATHWAY	hsa04664	4	68	0.0158318	0.0439331	5599;5602;3845;5295	MAPK8;MAPK10;KRAS;PIK3R1	hsa-miR-374b-3p;hsa-miR-221-3p;hsa-miR-671-5p;hsa-miR-103a-3p,hsa-miR-221-3p
Adipocytokine signaling pathway	KEGG PATHWAY	hsa04920	4	70	0.017345	0.0475381	9021;5565;5602;5599	SOCS3;PRKAB2;MAPK10;MAPK8	hsa-miR-221-3p;hsa-miR-103a-3p;hsa-miR-221-3p;hsa-miR-374b-3p
Notch signaling pathway	KEGG PATHWAY	hsa04330	3	48	0.0307178	0.0733263	23385;3065;9612	NCSTN;HDAC1;NCOR2	hsa-miR-339-5p;hsa-miR-671-5p;hsa-miR-2277-5p,hsa-miR-25-5p
Nucleotide excision repair	KEGG PATHWAY	hsa03420	3	47	0.0291922	0.0704419	8451;5985;10714	CUL4A;RFC5;POLD3	hsa-miR-103a-3p;hsa-miR-339-5p;hsa-miR-103a-3p
Cholinergic synapse	KEGG PATHWAY	hsa04725	5	111	0.0199504	0.054012	2353;3845;5295;775;774	FOS;KRAS;PIK3R1;CACNA1C;CACNA1B	hsa-miR-221-3p;hsa-miR-671-5p;hsa-miR-103a-3p,hsa-miR-221-3p;hsa-miR-185-3p;hsa-miR-25-5p
Arrhythmogenic right ventricular cardiomyopathy (ARVC)	KEGG PATHWAY	hsa05412	4	74	0.0206344	0.0551907	6934;3678;775;3673	TCF7L2;ITGA5;CACNA1C;ITGA2	hsa-miR-505-3p;hsa-miR-222-5p;hsa-miR-185-3p;hsa-miR-103a-3p
Bladder cancer	KEGG PATHWAY	hsa05219	3	41	0.0209087	0.0552588	7422;3845;4193	VEGFA;KRAS;MDM2	hsa-miR-374b-3p;hsa-miR-671-5p;hsa-miR-221-3p
Platinum drug resistance	KEGG PATHWAY	hsa01524	4	75	0.0215124	0.0561852	4217;27113;5295;4193	MAP3K5;BBC3;PIK3R1;MDM2	hsa-miR-181a-3p;hsa-miR-221-3p;hsa-miR-103a-3p,hsa-miR-221-3p;hsa-miR-221-3p
Oxytocin signaling pathway	KEGG PATHWAY	hsa04921	6	158	0.0232683	0.0600646	775;5295;5565;3845;2353;387	CACNA1C;PIK3R1;PRKAB2;KRAS;FOS;RHOA	hsa-miR-185-3p;hsa-miR-103a-3p,hsa-miR-221-3p;hsa-miR-103a-3p;hsa-miR-671-5p;hsa-miR-221-3p;hsa-miR-128-1-5p
Bacterial invasion of epithelial cells	KEGG PATHWAY	hsa05100	4	78	0.0242821	0.0619613	3678;387;10163;5295	ITGA5;RHOA;WASF2;PIK3R1	hsa-miR-222-5p;hsa-miR-128-1-5p;hsa-miR-2277-5p;hsa-miR-103a-3p,hsa-miR-221-3p
Toxoplasmosis	KEGG PATHWAY	hsa05145	5	119	0.025719	0.0648819	5295;5599;6885;23118;5602	PIK3R1;MAPK8;MAP3K7;TAB2;MAPK10	hsa-miR-103a-3p,hsa-miR-221-3p;hsa-miR-374b-3p;hsa-miR-103a-3p;hsa-miR-222-5p;hsa-miR-221-3p
Ether lipid metabolism	KEGG PATHWAY	hsa00565	3	45	0.0262649	0.0655147	5168;5049;5048	ENPP2;PAFAH1B2;PAFAH1B1	hsa-miR-103a-3p;hsa-miR-103a-3p;hsa-miR-339-5p
Platelet activation	KEGG PATHWAY	hsa04611	5	122	0.02813	0.0693874	83660;8773;387;5295;3673	TLN2;SNAP23;RHOA;PIK3R1;ITGA2	hsa-miR-25-5p;hsa-miR-25-5p;hsa-miR-128-1-5p;hsa-miR-103a-3p,hsa-miR-221-3p;hsa-miR-103a-3p
Lysosome	KEGG PATHWAY	hsa04142	5	123	0.0289644	0.0704419	6556;2799;3423;23163;2760	SLC11A1;GNS;IDS;GGA3;GM2A	hsa-miR-339-5p;hsa-miR-103a-3p,hsa-miR-25-5p;hsa-miR-185-3p;hsa-miR-103a-3p;hsa-miR-25-5p
Glycosaminoglycan degradation	KEGG PATHWAY	hsa00531	2	19	0.031598	0.074625	2799;3423	GNS;IDS	hsa-miR-103a-3p,hsa-miR-25-5p;hsa-miR-185-3p
Glycosaminoglycan biosynthesis - chondroitin sulfate / dermatan sulfate	KEGG PATHWAY	hsa00532	2	20	0.0344561	0.0805184	55501;22856	CHST12;CHSY1	hsa-miR-25-5p;hsa-miR-221-3p
Prostate cancer	KEGG PATHWAY	hsa05215	4	89	0.0362167	0.0837511	6934;5295;3845;4193	TCF7L2;PIK3R1;KRAS;MDM2	hsa-miR-505-3p;hsa-miR-103a-3p,hsa-miR-221-3p;hsa-miR-671-5p;hsa-miR-221-3p
Dilated cardiomyopathy	KEGG PATHWAY	hsa05414	4	90	0.0374422	0.0856925	7170;3678;775;3673	TPM3;ITGA5;CACNA1C;ITGA2	hsa-miR-25-5p;hsa-miR-222-5p;hsa-miR-185-3p;hsa-miR-103a-3p
GnRH signaling pathway	KEGG PATHWAY	hsa04912	4	91	0.0386913	0.0876477	3845;5602;775;5599	KRAS;MAPK10;CACNA1C;MAPK8	hsa-miR-671-5p;hsa-miR-221-3p;hsa-miR-185-3p;hsa-miR-374b-3p
Measles	KEGG PATHWAY	hsa05162	5	136	0.0412437	0.0915981	27113;23118;6885;1021;5295	BBC3;TAB2;MAP3K7;CDK6;PIK3R1	hsa-miR-221-3p;hsa-miR-222-5p;hsa-miR-103a-3p;hsa-miR-103a-3p;hsa-miR-103a-3p,hsa-miR-221-3p
Fc gamma R-mediated phagocytosis	KEGG PATHWAY	hsa04666	4	93	0.0412604	0.0915981	382;23396;10163;5295	ARF6;PIP5K1C;WASF2;PIK3R1	hsa-miR-103a-3p;hsa-miR-25-5p;hsa-miR-2277-5p;hsa-miR-103a-3p,hsa-miR-221-3p
Pathogenic Escherichia coli infection	KEGG PATHWAY	hsa05130	3	55	0.0425398	0.0926748	8440;387;7534	NCK2;RHOA;YWHAZ	hsa-miR-505-3p;hsa-miR-128-1-5p;hsa-miR-671-5p
Longevity regulating pathway	KEGG PATHWAY	hsa04211	4	94	0.0425803	0.0926748	6648;5565;5295;3845	SOD2;PRKAB2;PIK3R1;KRAS	hsa-miR-339-5p;hsa-miR-103a-3p;hsa-miR-103a-3p,hsa-miR-221-3p;hsa-miR-671-5p
Mismatch repair	KEGG PATHWAY	hsa03430	2	23	0.0435958	0.0939637	5985;10714	RFC5;POLD3	hsa-miR-339-5p;hsa-miR-103a-3p
Non-small cell lung cancer	KEGG PATHWAY	hsa05223	3	56	0.0443895	0.0947544	3845;5295;1021	KRAS;PIK3R1;CDK6	hsa-miR-671-5p;hsa-miR-103a-3p,hsa-miR-221-3p;hsa-miR-103a-3p
Huntington's disease	KEGG PATHWAY	hsa05016	6	193	0.0516574	0.109218	1340;27113;9519;3065;4712;6648	COX6B1;BBC3;TBPL1;HDAC1;NDUFB6;SOD2	hsa-miR-374b-3p;hsa-miR-221-3p;hsa-miR-103a-3p;hsa-miR-671-5p;hsa-miR-222-5p;hsa-miR-339-5p
VEGF signaling pathway	KEGG PATHWAY	hsa04370	3	61	0.0542233	0.113562	5295;3845;7422	PIK3R1;KRAS;VEGFA	hsa-miR-103a-3p,hsa-miR-221-3p;hsa-miR-671-5p;hsa-miR-374b-3p
Adrenergic signaling in cardiomyocytes	KEGG PATHWAY	hsa04261	5	149	0.0562474	0.115916	5515;7170;5527;775;5295	PPP2CA;TPM3;PPP2R5C;CACNA1C;PIK3R1	hsa-miR-185-3p;hsa-miR-25-5p;hsa-miR-103a-3p;hsa-miR-185-3p;hsa-miR-103a-3p,hsa-miR-221-3p
Metabolic pathways	KEGG PATHWAY	hsa01100	24	1243	0.0563916	0.115916	2799;64802;9563;79623;10714;271;4144;84245;4712;10715;1586;5048;1340;55750;525;5832;3423;3242;326625;5049;22856;95;9110;23396	GNS;NMNAT1;H6PD;GALNT14;POLD3;AMPD2;MAT2A;MRI1;NDUFB6;CERS1;CYP17A1;PAFAH1B1;COX6B1;AGK;ATP6V1B1;ALDH18A1;IDS;HPD;MMAB;PAFAH1B2;CHSY1;ACY1;MTMR4;PIP5K1C	hsa-miR-103a-3p,hsa-miR-25-5p;hsa-miR-25-5p;hsa-miR-339-5p;hsa-miR-4485-3p;hsa-miR-103a-3p;hsa-miR-25-5p;hsa-miR-221-3p;hsa-miR-25-5p;hsa-miR-222-5p;hsa-miR-2277-5p;hsa-miR-25-5p;hsa-miR-339-5p;hsa-miR-374b-3p;hsa-miR-181a-3p;hsa-miR-2277-5p;hsa-miR-181a-3p;hsa-miR-185-3p;hsa-miR-25-5p;hsa-miR-374b-3p;hsa-miR-103a-3p;hsa-miR-221-3p;hsa-miR-671-5p;hsa-miR-103a-3p;hsa-miR-25-5p
Synaptic vesicle cycle	KEGG PATHWAY	hsa04721	3	63	0.0584243	0.118993	10815;525;774	CPLX1;ATP6V1B1;CACNA1B	hsa-miR-2277-5p;hsa-miR-2277-5p;hsa-miR-25-5p
Phagosome	KEGG PATHWAY	hsa04145	5	155	0.0641017	0.128311	3106;525;3678;821;3673	HLA-B;ATP6V1B1;ITGA5;CANX;ITGA2	hsa-miR-222-5p;hsa-miR-2277-5p;hsa-miR-222-5p;hsa-miR-505-3p;hsa-miR-103a-3p
Hippo signaling pathway -multiple species	KEGG PATHWAY	hsa04392	2	29	0.0641555	0.128311	60485;4771	SAV1;NF2	hsa-miR-103a-3p;hsa-miR-25-5p
Renal cell carcinoma	KEGG PATHWAY	hsa05211	3	67	0.0672691	0.130998	5295;3845;7422	PIK3R1;KRAS;VEGFA	hsa-miR-103a-3p,hsa-miR-221-3p;hsa-miR-671-5p;hsa-miR-374b-3p
Amphetamine addiction	KEGG PATHWAY	hsa05031	3	67	0.0672691	0.130998	2353;3065;775	FOS;HDAC1;CACNA1C	hsa-miR-221-3p;hsa-miR-671-5p;hsa-miR-185-3p
Central carbon metabolism in cancer	KEGG PATHWAY	hsa05230	3	67	0.0672691	0.130998	3815;5295;3845	KIT;PIK3R1;KRAS	hsa-miR-4485-3p;hsa-miR-103a-3p,hsa-miR-221-3p;hsa-miR-671-5p
Jak-STAT signaling pathway	KEGG PATHWAY	hsa04630	5	158	0.0682481	0.131749	9021;9655;9180;5295;50615	SOCS3;SOCS5;OSMR;PIK3R1;IL21R	hsa-miR-221-3p;hsa-miR-374b-3p;hsa-miR-25-5p;hsa-miR-103a-3p,hsa-miR-221-3p;hsa-miR-128-1-5p
Serotonergic synapse	KEGG PATHWAY	hsa04726	4	112	0.0703356	0.134608	2560;3845;775;774	GABRB1;KRAS;CACNA1C;CACNA1B	hsa-miR-103a-3p;hsa-miR-671-5p;hsa-miR-185-3p;hsa-miR-25-5p
RIG-I-like receptor signaling pathway	KEGG PATHWAY	hsa04622	3	70	0.0742781	0.140938	6885;5599;5602	MAP3K7;MAPK8;MAPK10	hsa-miR-103a-3p;hsa-miR-374b-3p;hsa-miR-221-3p
B cell receptor signaling pathway	KEGG PATHWAY	hsa04662	3	73	0.0815964	0.153512	2353;5295;3845	FOS;PIK3R1;KRAS	hsa-miR-221-3p;hsa-miR-103a-3p,hsa-miR-221-3p;hsa-miR-671-5p
Alzheimer's disease	KEGG PATHWAY	hsa05010	5	168	0.0831127	0.155051	23621;23385;4712;1340;775	BACE1;NCSTN;NDUFB6;COX6B1;CACNA1C	hsa-miR-339-5p;hsa-miR-339-5p;hsa-miR-222-5p;hsa-miR-374b-3p;hsa-miR-185-3p
Leishmaniasis	KEGG PATHWAY	hsa05140	3	74	0.0841025	0.15559	2353;6885;23118	FOS;MAP3K7;TAB2	hsa-miR-221-3p;hsa-miR-103a-3p;hsa-miR-222-5p
Biosynthesis of amino acids	KEGG PATHWAY	hsa01230	3	75	0.0866412	0.158962	5832;95;4144	ALDH18A1;ACY1;MAT2A	hsa-miR-181a-3p;hsa-miR-671-5p;hsa-miR-221-3p
Base excision repair	KEGG PATHWAY	hsa03410	1	33	0.366924	0.44512	10714	POLD3	hsa-miR-103a-3p
Cardiac muscle contraction	KEGG PATHWAY	hsa04260	3	78	0.0944485	0.171865	1340;7170;775	COX6B1;TPM3;CACNA1C	hsa-miR-374b-3p;hsa-miR-25-5p;hsa-miR-185-3p
Aldosterone-regulated sodium reabsorption	KEGG PATHWAY	hsa04960	2	39	0.103845	0.187427	5295;3845	PIK3R1;KRAS	hsa-miR-103a-3p,hsa-miR-221-3p;hsa-miR-671-5p
Nicotine addiction	KEGG PATHWAY	hsa05033	2	40	0.108113	0.193557	2560;774	GABRB1;CACNA1B	hsa-miR-103a-3p;hsa-miR-25-5p
Spliceosome	KEGG PATHWAY	hsa03040	4	134	0.11399	0.202446	10285;7919;144983;22985	SMNDC1;DDX39B;HNRNPA1L2;ACIN1	hsa-miR-222-5p;hsa-miR-671-5p;hsa-miR-339-5p;hsa-miR-128-1-5p
Small cell lung cancer	KEGG PATHWAY	hsa05222	3	86	0.116586	0.205413	5295;1021;3673	PIK3R1;CDK6;ITGA2	hsa-miR-103a-3p,hsa-miR-221-3p;hsa-miR-103a-3p;hsa-miR-103a-3p
Hematopoietic cell lineage	KEGG PATHWAY	hsa04640	3	88	0.122399	0.212285	3815;3678;3673	KIT;ITGA5;ITGA2	hsa-miR-4485-3p;hsa-miR-222-5p;hsa-miR-103a-3p
GABAergic synapse	KEGG PATHWAY	hsa04727	3	88	0.122399	0.212285	2560;775;774	GABRB1;CACNA1C;CACNA1B	hsa-miR-103a-3p;hsa-miR-185-3p;hsa-miR-25-5p
Vasopressin-regulated water reabsorption	KEGG PATHWAY	hsa04962	2	44	0.125625	0.216193	9230;554	RAB11B;AVPR2	hsa-miR-25-5p;hsa-miR-25-5p
Cysteine and methionine metabolism	KEGG PATHWAY	hsa00270	2	45	0.130104	0.21918	84245;4144	MRI1;MAT2A	hsa-miR-25-5p;hsa-miR-221-3p
Basal transcription factors	KEGG PATHWAY	hsa03022	2	45	0.130104	0.21918	9519;129685	TBPL1;TAF8	hsa-miR-103a-3p;hsa-miR-671-5p
Morphine addiction	KEGG PATHWAY	hsa05032	3	91	0.131311	0.21918	5144;2560;774	PDE4D;GABRB1;CACNA1B	hsa-miR-103a-3p;hsa-miR-103a-3p;hsa-miR-25-5p
Rheumatoid arthritis	KEGG PATHWAY	hsa05323	3	91	0.131311	0.21918	525;2353;7422	ATP6V1B1;FOS;VEGFA	hsa-miR-2277-5p;hsa-miR-221-3p;hsa-miR-374b-3p
Pentose phosphate pathway	KEGG PATHWAY	hsa00030	1	29	0.331928	0.423495	9563	H6PD	hsa-miR-339-5p
Sulfur relay system	KEGG PATHWAY	hsa04122	1	10	0.137451	0.227718	27304	MOCS3	hsa-miR-25-5p
Cell adhesion molecules (CAMs)	KEGG PATHWAY	hsa04514	4	146	0.141784	0.233155	3106;58494;5792;1462	HLA-B;JAM2;PTPRF;VCAN	hsa-miR-222-5p;hsa-miR-25-5p;hsa-miR-25-5p;hsa-miR-103a-3p
Ubiquinone and other terpenoid-quinone biosynthesis	KEGG PATHWAY	hsa00130	1	11	0.14897	0.243171	3242	HPD	hsa-miR-25-5p
Inflammatory mediator regulation of TRP channels	KEGG PATHWAY	hsa04750	3	98	0.152937	0.244371	5602;5599;5295	MAPK10;MAPK8;PIK3R1	hsa-miR-221-3p;hsa-miR-374b-3p;hsa-miR-103a-3p,hsa-miR-221-3p
Phosphatidylinositol signaling system	KEGG PATHWAY	hsa04070	3	98	0.152937	0.244371	5295;23396;9110	PIK3R1;PIP5K1C;MTMR4	hsa-miR-103a-3p,hsa-miR-221-3p;hsa-miR-25-5p;hsa-miR-103a-3p
Ovarian steroidogenesis	KEGG PATHWAY	hsa04913	2	50	0.153007	0.244371	1545;1586	CYP1B1;CYP17A1	hsa-miR-221-3p;hsa-miR-25-5p
Estrogen signaling pathway	KEGG PATHWAY	hsa04915	3	99	0.156114	0.244787	2353;5295;3845	FOS;PIK3R1;KRAS	hsa-miR-221-3p;hsa-miR-103a-3p,hsa-miR-221-3p;hsa-miR-671-5p
Cytokine-cytokine receptor interaction	KEGG PATHWAY	hsa04060	6	265	0.15642	0.244787	3815;55504;93;9180;50615;7422	KIT;TNFRSF19;ACVR2B;OSMR;IL21R;VEGFA	hsa-miR-4485-3p;hsa-miR-4485-3p;hsa-miR-103a-3p,hsa-miR-221-3p;hsa-miR-25-5p;hsa-miR-128-1-5p;hsa-miR-374b-3p
Vibrio cholerae infection	KEGG PATHWAY	hsa05110	2	51	0.157678	0.244787	7082;525	TJP1;ATP6V1B1	hsa-miR-103a-3p;hsa-miR-2277-5p
Amyotrophic lateral sclerosis (ALS)	KEGG PATHWAY	hsa05014	2	51	0.157678	0.244787	4217;84134	MAP3K5;TOMM40L	hsa-miR-181a-3p;hsa-miR-1296-5p
Mineral absorption	KEGG PATHWAY	hsa04978	2	52	0.162376	0.248603	6556;6550	SLC11A1;SLC9A3	hsa-miR-339-5p;hsa-miR-2277-5p
Lysine degradation	KEGG PATHWAY	hsa00310	2	52	0.162376	0.248603	55870;64324	ASH1L;NSD1	hsa-miR-103a-3p,hsa-miR-374b-3p;hsa-miR-25-5p
Glucagon signaling pathway	KEGG PATHWAY	hsa04922	3	102	0.165765	0.252054	5255;5565;5261	PHKA1;PRKAB2;PHKG2	hsa-miR-103a-3p;hsa-miR-103a-3p;hsa-miR-4485-3p
Non-homologous end-joining	KEGG PATHWAY	hsa03450	1	13	0.171548	0.259073	79840	NHEJ1	hsa-miR-181a-3p
Steroid hormone biosynthesis	KEGG PATHWAY	hsa00140	2	58	0.191033	0.286549	1545;1586	CYP1B1;CYP17A1	hsa-miR-221-3p;hsa-miR-25-5p
Viral myocarditis	KEGG PATHWAY	hsa05416	2	60	0.200731	0.297082	3106;27	HLA-B;ABL2	hsa-miR-222-5p;hsa-miR-103a-3p
Long-term depression	KEGG PATHWAY	hsa04730	2	60	0.200731	0.297082	5515;3845	PPP2CA;KRAS	hsa-miR-185-3p;hsa-miR-671-5p
RNA transport	KEGG PATHWAY	hsa03013	4	172	0.209621	0.308185	10762;54913;7919;22985	NUP50;RPP25;DDX39B;ACIN1	hsa-miR-103a-3p,hsa-miR-374b-3p,hsa-miR-671-5p;hsa-miR-25-5p;hsa-miR-671-5p;hsa-miR-128-1-5p
Phenylalanine metabolism	KEGG PATHWAY	hsa00360	1	17	0.214928	0.313908	3242	HPD	hsa-miR-25-5p
Leukocyte transendothelial migration	KEGG PATHWAY	hsa04670	3	118	0.219799	0.318284	58494;387;5295	JAM2;RHOA;PIK3R1	hsa-miR-25-5p;hsa-miR-128-1-5p;hsa-miR-103a-3p,hsa-miR-221-3p
Purine metabolism	KEGG PATHWAY	hsa00230	4	176	0.220791	0.318284	5144;953;10714;271	PDE4D;ENTPD1;POLD3;AMPD2	hsa-miR-103a-3p;hsa-miR-103a-3p;hsa-miR-103a-3p;hsa-miR-25-5p
2-Oxocarboxylic acid metabolism	KEGG PATHWAY	hsa01210	1	18	0.225414	0.322851	95	ACY1	hsa-miR-671-5p
Tuberculosis	KEGG PATHWAY	hsa05152	4	179	0.22927	0.325392	5602;387;5599;1051	MAPK10;RHOA;MAPK8;CEBPB	hsa-miR-221-3p;hsa-miR-128-1-5p;hsa-miR-374b-3p;hsa-miR-2277-5p
Long-term potentiation	KEGG PATHWAY	hsa04720	2	66	0.23012	0.325392	3845;775	KRAS;CACNA1C	hsa-miR-671-5p;hsa-miR-185-3p
Calcium signaling pathway	KEGG PATHWAY	hsa04020	4	180	0.232115	0.326136	5255;5261;775;774	PHKA1;PHKG2;CACNA1C;CACNA1B	hsa-miR-103a-3p;hsa-miR-4485-3p;hsa-miR-185-3p;hsa-miR-25-5p
Bile secretion	KEGG PATHWAY	hsa04976	2	71	0.254812	0.353049	6550;28234	SLC9A3;SLCO1B3	hsa-miR-2277-5p;hsa-miR-181a-3p
Inositol phosphate metabolism	KEGG PATHWAY	hsa00562	2	71	0.254812	0.353049	23396;9110	PIP5K1C;MTMR4	hsa-miR-25-5p;hsa-miR-103a-3p
Arginine biosynthesis	KEGG PATHWAY	hsa00220	1	21	0.25604	0.353049	95	ACY1	hsa-miR-671-5p
Oxidative phosphorylation	KEGG PATHWAY	hsa00190	3	133	0.273151	0.373316	1340;525;4712	COX6B1;ATP6V1B1;NDUFB6	hsa-miR-374b-3p;hsa-miR-2277-5p;hsa-miR-222-5p
Biosynthesis of unsaturated fatty acids	KEGG PATHWAY	hsa01040	1	23	0.275783	0.373316	3992	FADS1	hsa-miR-25-5p
Proximal tubule bicarbonate reclamation	KEGG PATHWAY	hsa04964	1	23	0.275783	0.373316	6550	SLC9A3	hsa-miR-2277-5p
Natural killer cell mediated cytotoxicity	KEGG PATHWAY	hsa04650	3	135	0.280381	0.37724	3106;5295;3845	HLA-B;PIK3R1;KRAS	hsa-miR-222-5p;hsa-miR-103a-3p,hsa-miR-221-3p;hsa-miR-671-5p
Antigen processing and presentation	KEGG PATHWAY	hsa04612	2	78	0.289437	0.387079	3106;821	HLA-B;CANX	hsa-miR-222-5p;hsa-miR-505-3p
Ribosome	KEGG PATHWAY	hsa03010	3	138	0.291257	0.38718	124995;6234;51187	MRPL10;RPS28;RSL24D1	hsa-miR-2277-5p;hsa-miR-25-5p;hsa-miR-374b-3p
Maturity onset diabetes of the young	KEGG PATHWAY	hsa04950	1	26	0.304421	0.40227	4821	NKX2-2	hsa-miR-128-1-5p
ECM-receptor interaction	KEGG PATHWAY	hsa04512	2	82	0.309151	0.406103	3678;3673	ITGA5;ITGA2	hsa-miR-222-5p;hsa-miR-103a-3p
Collecting duct acid secretion	KEGG PATHWAY	hsa04966	1	27	0.313713	0.407731	525	ATP6V1B1	hsa-miR-2277-5p
Sphingolipid metabolism	KEGG PATHWAY	hsa00600	1	47	0.475611	0.527928	10715	CERS1	hsa-miR-2277-5p
Peroxisome	KEGG PATHWAY	hsa04146	2	83	0.314063	0.407731	390916;6648	NUDT19;SOD2	hsa-miR-25-5p;hsa-miR-339-5p
Insulin secretion	KEGG PATHWAY	hsa04911	2	85	0.323864	0.41801	775;54795	CACNA1C;TRPM4	hsa-miR-185-3p;hsa-miR-4485-3p
Homologous recombination	KEGG PATHWAY	hsa03440	1	29	0.331928	0.423495	10714	POLD3	hsa-miR-103a-3p
Gap junction	KEGG PATHWAY	hsa04540	2	88	0.338495	0.428866	7082;3845	TJP1;KRAS	hsa-miR-103a-3p;hsa-miR-671-5p
Nicotinate and nicotinamide metabolism	KEGG PATHWAY	hsa00760	1	30	0.340854	0.428866	64802	NMNAT1	hsa-miR-25-5p
Ribosome biogenesis in eukaryotes	KEGG PATHWAY	hsa03008	2	89	0.343351	0.428866	57455;54913	REXO1;RPP25	hsa-miR-25-5p;hsa-miR-25-5p
Protein digestion and absorption	KEGG PATHWAY	hsa04974	2	90	0.348196	0.428866	7512;6550	XPNPEP2;SLC9A3	hsa-miR-4485-3p;hsa-miR-2277-5p
Mucin type O-Glycan biosynthesis	KEGG PATHWAY	hsa00512	1	31	0.349661	0.428866	79623	GALNT14	hsa-miR-4485-3p
Circadian rhythm	KEGG PATHWAY	hsa04710	1	31	0.349661	0.428866	5565	PRKAB2	hsa-miR-103a-3p
Other types of O-glycan biosynthesis	KEGG PATHWAY	hsa00514	1	31	0.349661	0.428866	8473	OGT	hsa-miR-103a-3p
NF-kappa B signaling pathway	KEGG PATHWAY	hsa04064	2	93	0.362655	0.44236	6885;23118	MAP3K7;TAB2	hsa-miR-103a-3p;hsa-miR-222-5p
Circadian entrainment	KEGG PATHWAY	hsa04713	2	95	0.372228	0.449101	2353;775	FOS;CACNA1C	hsa-miR-221-3p;hsa-miR-185-3p
SNARE interactions in vesicular transport	KEGG PATHWAY	hsa04130	1	34	0.375383	0.450459	8773	SNAP23	hsa-miR-25-5p
Tyrosine metabolism	KEGG PATHWAY	hsa00350	1	35	0.383729	0.457999	3242	HPD	hsa-miR-25-5p
cGMP-PKG signaling pathway	KEGG PATHWAY	hsa04022	3	167	0.396507	0.47072	387;775;5295	RHOA;CACNA1C;PIK3R1	hsa-miR-128-1-5p;hsa-miR-185-3p;hsa-miR-103a-3p,hsa-miR-221-3p
HIF-1 signaling pathway	KEGG PATHWAY	hsa04066	2	103	0.409898	0.484028	5295;7422	PIK3R1;VEGFA	hsa-miR-103a-3p,hsa-miR-221-3p;hsa-miR-374b-3p
Allograft rejection	KEGG PATHWAY	hsa05330	1	39	0.416015	0.488653	3106	HLA-B	hsa-miR-222-5p
Pyrimidine metabolism	KEGG PATHWAY	hsa00240	2	105	0.419144	0.489736	953;10714	ENTPD1;POLD3	hsa-miR-103a-3p;hsa-miR-103a-3p
Regulation of autophagy	KEGG PATHWAY	hsa04140	1	40	0.42382	0.490041	22863	ATG14	hsa-miR-103a-3p
Tryptophan metabolism	KEGG PATHWAY	hsa00380	1	40	0.42382	0.490041	1545	CYP1B1	hsa-miR-221-3p
Graft-versus-host disease	KEGG PATHWAY	hsa05332	1	42	0.439117	0.502495	3106	HLA-B	hsa-miR-222-5p
Porphyrin and chlorophyll metabolism	KEGG PATHWAY	hsa00860	1	42	0.439117	0.502495	326625	MMAB	hsa-miR-374b-3p
Type I diabetes mellitus	KEGG PATHWAY	hsa04940	1	44	0.454009	0.514235	3106	HLA-B	hsa-miR-222-5p
Proteasome	KEGG PATHWAY	hsa03050	1	44	0.454009	0.514235	5690	PSMB2	hsa-miR-671-5p
Glutamatergic synapse	KEGG PATHWAY	hsa04724	2	114	0.459797	0.518146	2900;775	GRIK4;CACNA1C	hsa-miR-339-5p;hsa-miR-185-3p
Chemokine signaling pathway	KEGG PATHWAY	hsa04062	3	187	0.466776	0.522656	387;3845;5295	RHOA;KRAS;PIK3R1	hsa-miR-128-1-5p;hsa-miR-671-5p;hsa-miR-103a-3p,hsa-miR-221-3p
Carbohydrate digestion and absorption	KEGG PATHWAY	hsa04973	1	46	0.468507	0.522656	5295	PIK3R1	hsa-miR-103a-3p,hsa-miR-221-3p
Fatty acid metabolism	KEGG PATHWAY	hsa01212	1	48	0.48262	0.533043	3992	FADS1	hsa-miR-25-5p
Vascular smooth muscle contraction	KEGG PATHWAY	hsa04270	2	120	0.485961	0.534076	387;775	RHOA;CACNA1C	hsa-miR-128-1-5p;hsa-miR-185-3p
Arginine and proline metabolism	KEGG PATHWAY	hsa00330	1	50	0.496359	0.542816	5832	ALDH18A1	hsa-miR-181a-3p
Neuroactive ligand-receptor interaction	KEGG PATHWAY	hsa04080	4	278	0.520905	0.566105	10316;2560;2900;554	NMUR1;GABRB1;GRIK4;AVPR2	hsa-miR-25-5p;hsa-miR-103a-3p;hsa-miR-339-5p;hsa-miR-25-5p
Autoimmune thyroid disease	KEGG PATHWAY	hsa05320	1	54	0.522755	0.566105	3106	HLA-B	hsa-miR-222-5p
Legionellosis	KEGG PATHWAY	hsa05134	1	55	0.529135	0.570233	81876	RAB1B	hsa-miR-103a-3p
Regulation of lipolysis in adipocytes	KEGG PATHWAY	hsa04923	1	56	0.53543	0.574229	5295	PIK3R1	hsa-miR-103a-3p,hsa-miR-221-3p
Glycerolipid metabolism	KEGG PATHWAY	hsa00561	1	59	0.553815	0.591091	55750	AGK	hsa-miR-181a-3p
Parkinson's disease	KEGG PATHWAY	hsa05012	2	142	0.574808	0.610562	1340;4712	COX6B1;NDUFB6	hsa-miR-374b-3p;hsa-miR-222-5p
Renin secretion	KEGG PATHWAY	hsa04924	1	64	0.582858	0.616164	775	CACNA1C	hsa-miR-185-3p
Inflammatory bowel disease (IBD)	KEGG PATHWAY	hsa05321	1	66	0.59394	0.624904	50615	IL21R	hsa-miR-128-1-5p
Thyroid hormone synthesis	KEGG PATHWAY	hsa04918	1	71	0.620375	0.649638	821	CANX	hsa-miR-505-3p
Metabolism of xenobiotics by cytochrome P450	KEGG PATHWAY	hsa00980	1	73	0.630462	0.657101	1545	CYP1B1	hsa-miR-221-3p
RNA degradation	KEGG PATHWAY	hsa03018	1	77	0.64984	0.674133	4849	CNOT3	hsa-miR-185-3p
Aldosterone synthesis and secretion	KEGG PATHWAY	hsa04925	1	81	0.668204	0.689959	775	CACNA1C	hsa-miR-185-3p
Chemical carcinogenesis	KEGG PATHWAY	hsa05204	1	82	0.672642	0.691327	1545	CYP1B1	hsa-miR-221-3p
Taste transduction	KEGG PATHWAY	hsa04742	1	83	0.677022	0.692621	775	CACNA1C	hsa-miR-185-3p
Alcoholism	KEGG PATHWAY	hsa05034	2	179	0.697858	0.710663	3065;3845	HDAC1;KRAS	hsa-miR-671-5p;hsa-miR-671-5p
Glycerophospholipid metabolism	KEGG PATHWAY	hsa00564	1	95	0.725229	0.735164	56261	GPCPD1	hsa-miR-103a-3p
Pancreatic secretion	KEGG PATHWAY	hsa04972	1	96	0.728906	0.735533	387	RHOA	hsa-miR-128-1-5p
Amoebiasis	KEGG PATHWAY	hsa05146	1	100	0.74313	0.746492	5295	PIK3R1	hsa-miR-103a-3p,hsa-miR-221-3p
Carbon metabolism	KEGG PATHWAY	hsa01200	1	113	0.78441	0.78441	9563	H6PD	hsa-miR-339-5p
